# Supplementary material for: Pore engineering of an Fe–N–C electrocatalyst to enhance the performance for the oxygen reduction reaction by adding g-C3N4 into polyaniline and cyanamide as a precursor
Source: Royal Society of Chemistry journal article supplement (doi:10.1039/c9ta13831e), 2020-01-01
Supplement: c9ta13831e1.pdf [file c9ta13831e1.pdf]

## ***Supporting information***

Pore engineering of Fe-N-C electrocatalyst to enhance the performance for oxygen reduction reaction by adding g-C<sub>3</sub>N<sub>4</sub> into polyaniline and cyanamide as precursor

*Zhen Sun<sup>a,b</sup>, Jinbao Lin<sup>a,b</sup>, Kun Hou<sup>b</sup>, Lunhui Guan<sup>\*b</sup>, Hongbing Zhan<sup>\*a</sup>*

a. College of Material Science & Engineering, Fuzhou University, Fuzhou 350108, Fujian, P.R. China.

b. CAS Key Laboratory of Design and Assembly of Functional Nanostructures, and Fujian Provincial Key Laboratory of Nanomaterials, Fujian Institute of Research on the Structure of Matter, Chinese Academy of Sciences, Fuzhou, Fujian 350002,

† Corresponding Author: hbzhan@fzu.edu.cn; guanlh@fjirsm.ac.cn

### **Experimental Section:**

#### ***Synthetic procedures:***

***Synthesis of g-C<sub>3</sub>N<sub>4</sub>:*** 10 g of melamine and 10 g of cyanuric acid (98%) were dispersed into 800 ml of ethanol. The solution was stirred for 1 hour and dispersed by ultrasonic for another 4 hours. After centrifugation and drying, the samples were heated at the temperature with heating rate of 3 °C/min per minute to 550 °C in the quartz tube. The furnace was kept at 550 °C for 6h to obtain g-C<sub>3</sub>N<sub>4</sub>.

***Synthesis of Fe-N-C-(PANI+CM+g-C<sub>3</sub>N<sub>4</sub>) and Fe-N-C-(PANI), Fe-N-C-(PANI+CM) as reference samples:*** 3 ml of Aniline (ANI) oligomer and 8.0 g Cyanamide (CM) were first added into 420 ml 1M HCl solution. Then, 80 ml of FeCl<sub>3</sub> solution (5 g anhydrous FeCl<sub>3</sub> dissolved in 80 ml 1M HCl) was added, followed by adding (NH<sub>4</sub>)<sub>2</sub>S<sub>4</sub>O<sub>8</sub> solution (7.5 g dissolved in 22.5 g water). After stirring for 48 h, g-C<sub>3</sub>N<sub>4</sub> solution (0.5g as prepared g-C<sub>3</sub>N<sub>4</sub> dispersed in 100 ml water for 2h with ultrasound) was added. After stirring for another 2h, the mixture was poured into a heating plate, then evaporated and dried at 90 °C, then finally put into the quartz tube. The specimen were kept at 350 °C under N<sub>2</sub> atmosphere for 2h, and then polymerized at 900 °C for 1 hour (heating rate of 3 °C /min). The as prepared product was taken out and washed with 0.5M H<sub>2</sub>SO<sub>4</sub> to remove the residue iron nanoparticles and/or metal oxide. After drying at vacuum, the secondary heat treatment was conducted at 900 °C for 3h with a ramping rate of 3 °C/min under Ar atmosphere, the final product was obtained and denoted as Fe-N-C-(PANI+CM+g-C<sub>3</sub>N<sub>4</sub>). For comparison, the reference sample Fe-N-C-(PANI) were obtained by the polymerization and pyrolysis of only Aniline oligomer under the similar

condition, and the reference sample Fe-N-C-(PANI+CM) were obtained by pyrolysis of Aniline and Cyanamide.

### ***Physical Characterization of Materials:***

X-ray diffraction (XRD) measurements were performed with a Miniflex600 diffractometer using a Cu K $\alpha$  ( $\lambda = 1.5405 \text{ \AA}$ ) radiation source. Raman spectra were taken on a LabRAM HR spectrometer with 532 nm wavelength incident laser light. Scanning electron microscopy (SEM) characterization were taken on field emission scanning electron microscope (FESEM ZEISS SIGMA500). Transmission electron microscopy (TEM), high resolution transmission electron microscopy (HRTEM), high-annular dark-field scanning transmission electron microscopy (STEM) and element mapping analysis were taken on FEI Tecnai G2 F30 electron microscope operating at 200 kV. X-ray photoelectron spectroscopy (XPS) analysis was performed with an ESCALAB 250Xi X-ray photoelectron spectrometer (Thermo, America). The pore structures of the samples were analyzed by using an Autosorb-iQ2 (Quantachrome Instruments) physical absorber.

### **Electrochemical measurements:**

**Rotating Disk Electrode tests.** All electrocatalytic measurements were performed in a three-electrode cell using a rotating disk electrode (RDE, PINE Research Instrumentation) of 5.0 mm in diameter with an electrochemical workstation (CHI 760D, Shanghai Chenhua, China) in 0.1M KOH electrolyte. A platinum wire and Ag/AgCl (saturated KCl) electrode were used as the counter and reference electrodes, respectively. All potentials in this study are referenced to reversible hydrogen electrode (RHE),  $E_{(RHE)} = E_{(Ag/AgCl)} + 0.059\text{pH} + 0.197$ . The catalyst ink is prepared by dispersing the catalyst (5 mg) in solution (1 mL) containing isopropanol (0.95 mL) and 5 wt% Nafion solution (50  $\mu\text{L}$ ), followed by ultrasonication for 30 min. Then, a certain volume of catalyst ink was pipetted onto the GC surface to give a  $0.38 \text{ mg cm}^{-2}$  loading for all samples. The loading of commercial Pt/C (20 wt%, Johnson Matthey) was  $20 \text{ ug}_{Pt} \text{ cm}^{-2}$ . Prior to testing, the electrolyte was saturated with oxygen by bubbling  $\text{O}_2$  and a flow of  $\text{O}_2$  was maintained over the electrolyte during the measurements. Cyclic voltammetry (CV) and linear sweep voltammetry (LSV) curves of the catalyst under  $\text{N}_2$ -saturated alkaline electrolyte were also measured. The scan rate of LSV was  $10 \text{ mV s}^{-1}$  and the rotating speed was varied from 500 to 2500 rpm. For the ORR on a RDE, the electron transfer numbers can be calculated with Koutecky-Levich equations:

$$1/J = 1/J_L + 1/J_K = 1/(B\omega^{1/2}) + 1/J_K$$

where J is the measured current density; and JK are the kinetic and JL diffusion-limiting current densities, respectively;  $\omega$  is the angular velocity of the disk ( $\omega = 2\pi N$ , N is the linear rotation speed).

$$B = 0.2nFC_0(D_0)^{2/3}v^{-1/6}$$

$$J_k = nFKC_0$$

where  $n$  represents the transferred electron number;  $F$  is the Faraday constant ( $F = 96485 \text{ C mol}^{-1}$ );  $C_0$  is the bulk concentration of  $\text{O}_2$  ( $1.2 \times 10^{-6} \text{ mol cm}^{-3}$ );  $D_0$  is the diffusion coefficient of  $\text{O}_2$  in 0.1 M KOH electrolyte ( $1.9 \times 10^{-5} \text{ cm}^2 \text{ s}^{-1}$ );  $\nu$  is the kinematics viscosity for electrolyte ( $0.01 \text{ cm}^2 \text{ s}^{-1}$ ), and  $k$  is the electron-transferred rate constant.

### Zn-air battery assembly

The air electrodes used for liquid Zn-air batteries consisted of carbon paper (CP) with a gas diffusion layer (GDL), and a catalyst layer (CL). The CL was made by loading the catalyst ink onto the GDL by drop-casting, with a loading of  $2.0 \text{ mg cm}^{-2}$  for all catalysts. The catalyst ink was prepared as described for the electrochemical experiments. Electrochemical reactors with a total volume of 28 mL were constructed to test the liquid Zn-air batteries. A polished zinc plate (0.6 mm thickness) was used as the anode. 6 M KOH and 0.2 M  $\text{Zn}(\text{CH}_3\text{COO})_2$  were used as electrolyte.

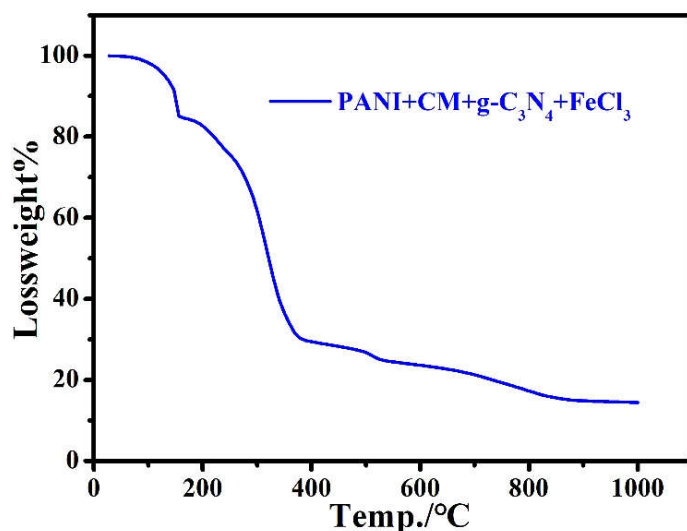

**Figure S1** TGA graph of the PANI+CM+g-C<sub>3</sub>N<sub>4</sub>+FeCl<sub>3</sub> obtained by heat treatment at 1000 °C ( $\text{N}_2$  flow:  $30 \text{ mL min}^{-1}$ , heating rate:  $3 \text{ °C min}^{-1}$ )

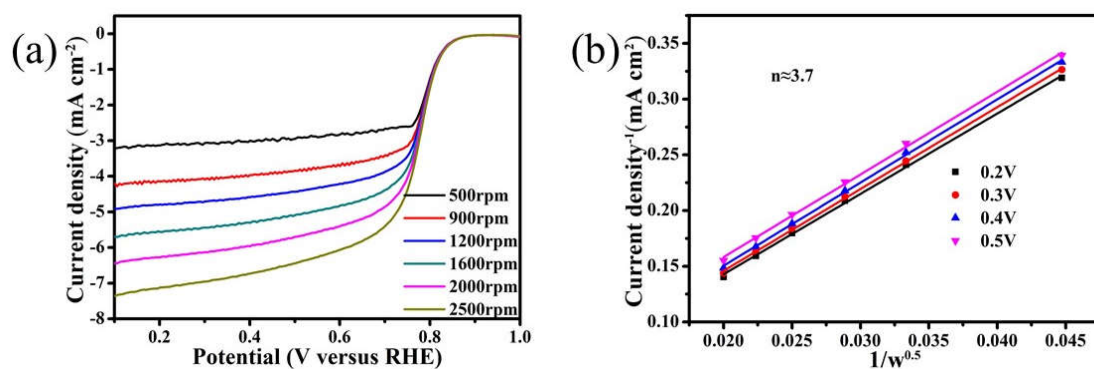

**Figure S2** (a) LSV curves of Fe-N-C-(PANI+CM+g-C<sub>3</sub>N<sub>4</sub>) sample at different rotating rates in O<sub>2</sub>-saturated 0.1M HClO<sub>4</sub> solution at room temperature ; (b) Corresponding K-L plots at different potentials for LSV curves and electron transfer number.

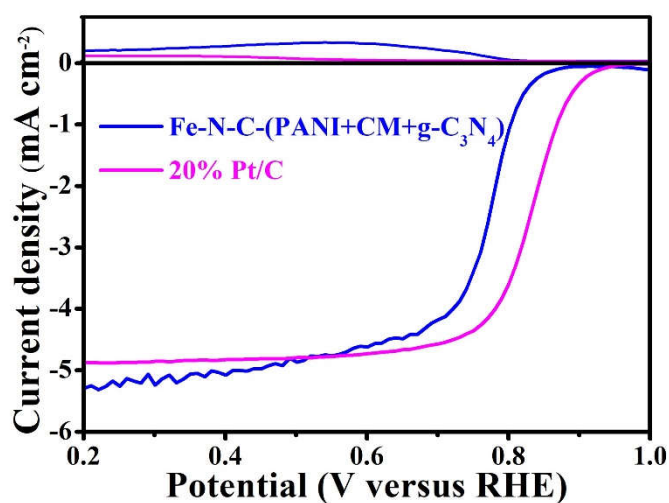

**Figure S3** LSV curves (both disc and ring current densities) of Fe-N-C-(PANI+CM+g-C<sub>3</sub>N<sub>4</sub>) and 20% Pt/C in O<sub>2</sub>-saturated 0.1M HClO<sub>4</sub> at a scan rate of 10 mV s<sup>-1</sup> and a rotating speed of 1600 rpm.

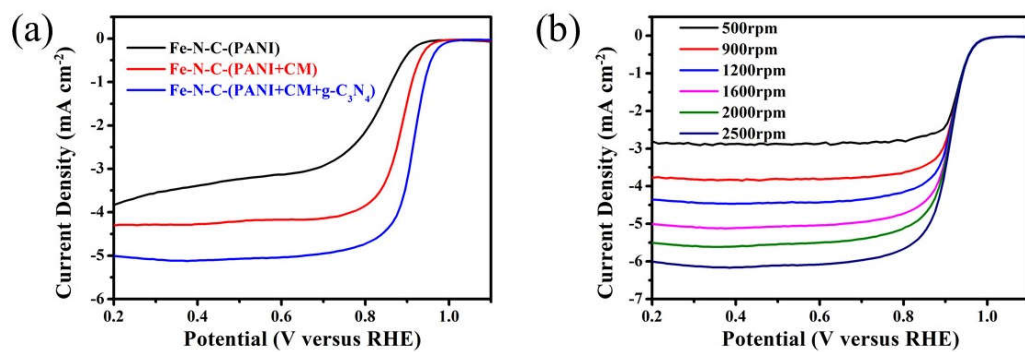

**Figure S4** (a) ORR polarization curves tested from RDE Fe-N-C-(PANI+CM+g-C<sub>3</sub>N<sub>4</sub>), Fe-N-C-(PANI+CM), and Fe-N-C-(PANI) in an O<sub>2</sub>-saturated 0.1 M KOH solution; (b) LSV curves of Fe-N-C-(PANI+CM+g-C<sub>3</sub>N<sub>4</sub>) sample at different rotating rates in O<sub>2</sub>-saturated 0.1M KOH solution at room temperature.

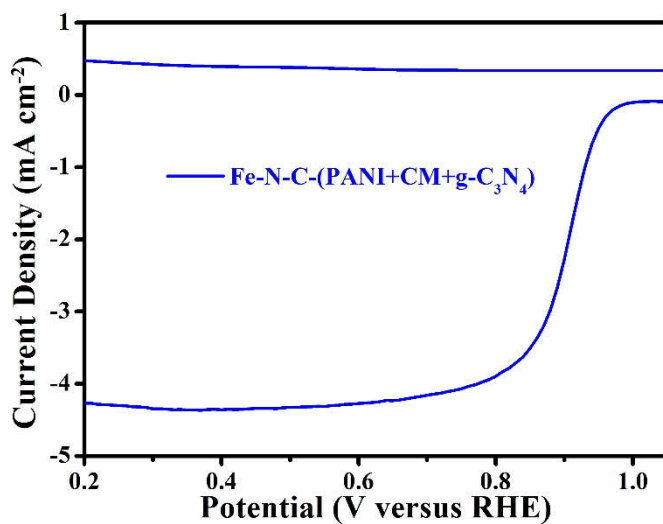

**Figure S5** LSV curves (both disc and ring current densities) of Fe-N-C-(PANI+CM+g-C<sub>3</sub>N<sub>4</sub>) in O<sub>2</sub>-saturated 0.1M KOH at a scan rate of 10 mV s<sup>-1</sup> and a rotating speed of 1600 rpm.

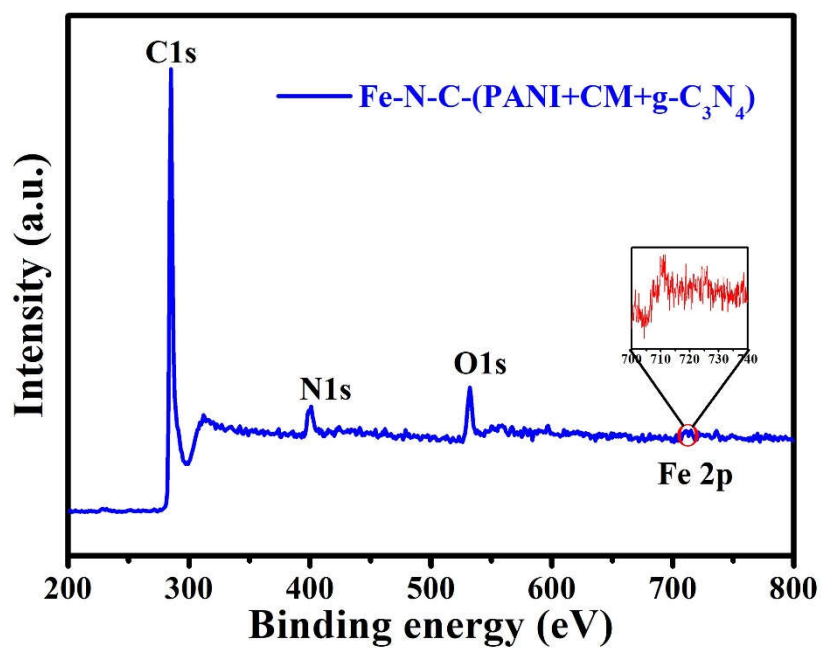

Figure S6 XPS survey spectrum of Fe-N-C-(PANI+CM+g-C<sub>3</sub>N<sub>4</sub>)

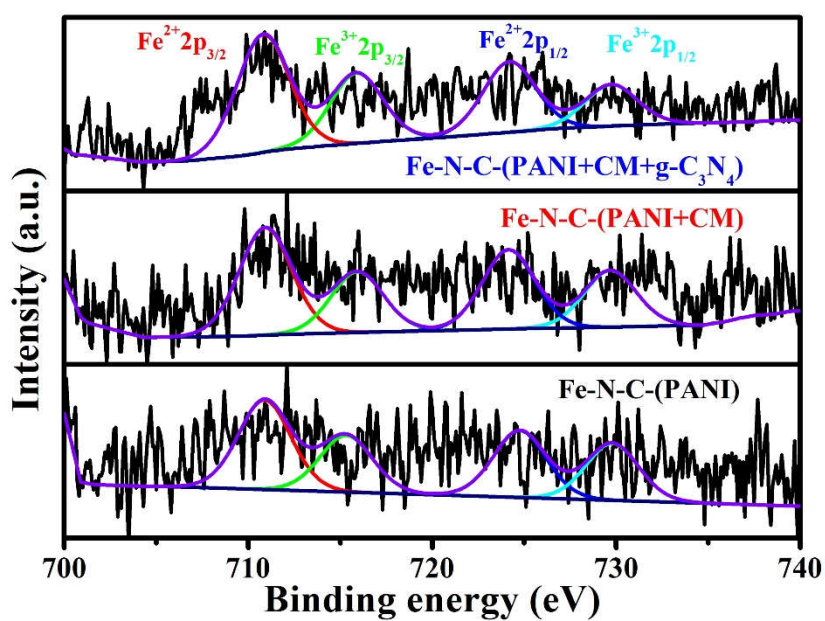

Figure S7 Fe 2p XPS spectra of Fe-N-C-(PANI), Fe-N-C-(PANI+CM) and Fe-N-C-(PANI+CM+g-C<sub>3</sub>N<sub>4</sub>).

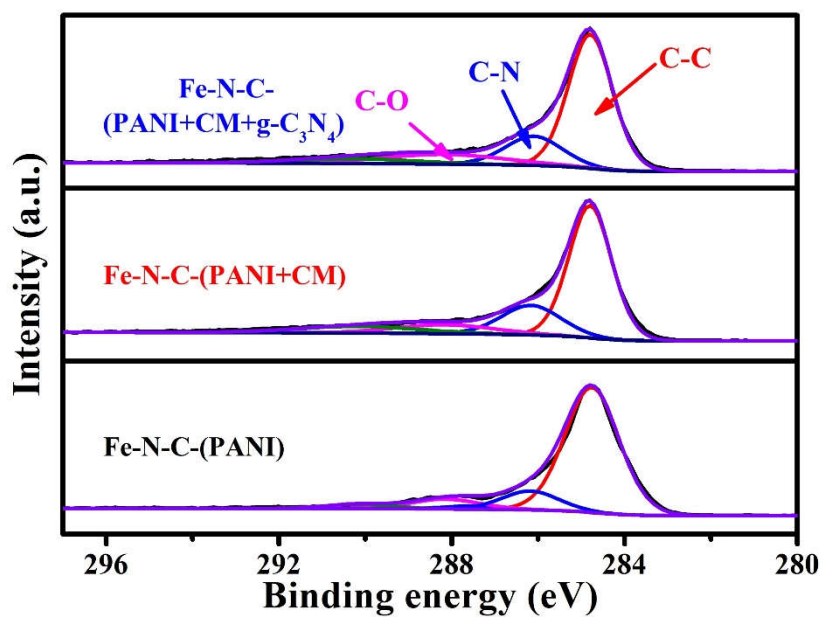

**Figure S8** C1s XPS spectra of Fe-N-C-(PANI), Fe-N-C-(PANI+CM) and Fe-N-C-(PANI+CM+g-C<sub>3</sub>N<sub>4</sub>).

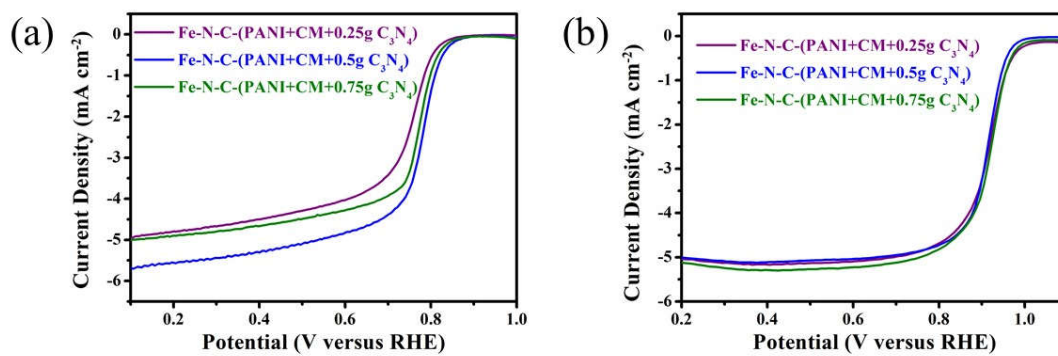

**Figure S9.** ORR polarization curves tested from RDE of Fe-N-C-(PANI+CM+g-C<sub>3</sub>N<sub>4</sub>) with different C<sub>3</sub>N<sub>4</sub> ratio, in an O<sub>2</sub>-saturated 0.1 M HClO<sub>4</sub> solution(a) and 0.1M KOH(b) with a rotation rate of 1600 rpm

**Table S1**

| <b>Samples</b>                                            | <b>Electrolyte</b> | <b>E<sub>1/2</sub>(V)</b> | <b>Reference</b>                                         |
|-----------------------------------------------------------|--------------------|---------------------------|----------------------------------------------------------|
| <b>Fe-N-C-<br/>(PANI+CM+g-C<sub>3</sub>N<sub>4</sub>)</b> | <b>0.1M KOH</b>    | <b>0.912</b>              | <b>This Work</b>                                         |
| <b>Fe-NC SAC</b>                                          | 0.1M KOH           | 0.90                      | Nature Communications (2019)10:1278                      |
| <b>Fe-NPC</b>                                             | 0.1M KOH           | 0.89                      | Applied Catalysis B: Environmental<br>249 (2019) 306-315 |
| <b>Fe SAs/N-C</b>                                         | 0.1M KOH           | 0.91                      | ACS Catal. 2019, 9, 2158-2163                            |
| <b>C-FeZIF-1.44-950</b>                                   | 0.1M KOH           | 0.864                     | Adv. Energy Mater. 2019, 9, 1802856                      |
| <b>Fe-NSDC</b>                                            | 0.1M KOH           | 0.84                      | Small 2019, 15, 1900307                                  |
| <b>Co@NHCC-800</b>                                        | 0.1M KOH           | 0.837                     | Applied Catalysis B: Environmental<br>254 (2019) 55-65   |
| <b>Mn/Fe-HIB-MOF</b>                                      | 0.1M KOH           | 0.833                     | Energy Environ Sci, 2019, 12, 727-738                    |
| <b>Fe<sub>SA</sub>-N-C</b>                                | 0.1M KOH           | 0.891                     | Angew. Chem. Int. Ed.<br>2018, 57, 8525-8529             |
| <b>SA-Fe-N-1.5-800</b>                                    | 0.1M KOH           | 0.91                      | Adv. Energy Mater. 2018, 8, 1801226                      |
| <b>Fe-N-C-900</b>                                         | 0.1M KOH           | 0.905                     | Adv. Energy Mater. 2018, 1801956                         |
